# Supplementary material for: Maintenance of xylem hydraulic function during winter in the woody bamboo Phyllostachys propinqua McClure
Source: PeerJ. 2023 Sep 13;11:e15979. doi: 10.7717/peerj.15979 (PMC10504893; doi:10.7717/peerj.15979)
Supplement: Supplemental Information 1 [file peerj-11-15979-s001.xlsx]

## Sheet: Sheet1
	Oct	Nov	Dec	Jan	Mar	Apr	Jun
branch embolism	21.38	38.93	62.58	72	47.37	39.68	23.09
	37.05	53.66	47.45	74.35	34.63	22.05	41.17
	38.3	53.23	36.92	60.74	43.96	52.24	23.66
	31.67	51.26	48.9	56.59	61.37	46.59	43.08
	18.95	49.08	58.03	59.83	53.49	11.46	10.05
	12.6	66.35	35.81	51.52	42.36	44.52	12.48
leaf embolism	24.31	37.44	66.32	90.14	60.33	36.17	12.33
	15.34	38.15	69.44	93.33	62.16	36.66	13.59
	16.78	45.62	78.09	83.67	70.44	32.23	19.44
	20.04	49.88	80.33	94.26	75.69	27.44	18.06
	21.45	40.33	75.26	90.26	62.22	28.19	17.47
	16.33	37.11	68.49	80.12	61.71	30.22	11.08
twig water potential	0.45	0.8	1.45	2.78	2.2	2.6	0.6
	0.6	1.15	1.76	4.5	3.65	1.2	0.75
	0.52	0.74	1.5	3.2	2.55	1.95	0.5
	0.71	0.66	2.1	2.7	2.4	2	0.5
	0.46	1.45	1.9	4.8	1.85	2.15	0.65
	0.58	1.1	1.1	3.14	3	1.4	0.55
branch RWC	48.2249	57.3449	85.0891	89.8999	61.6185	73.1389	50.284
	52.4239	71.5335	78.4797	52.2439	80.11	75.6007	54.4701
	58.2668	83.2374	86.7922	67.3548	63.6431	53.017	70.6403
	60.405	89.1649	80.5103	64.4905	66.13	68.894	49.5943
	57.2536	81.3649	69.3301	78.66	89.8569	41.4132	48.33
	50.1143	61.0984	80.0864	56.77	69.8132	61.4869	61.22
leaf RWC	91.2132	71.6209	46.7472	34.5836	42.8855	84.9291	122.015
	104.803	72.3111	44.3486	32.4477	43.6777	92.4355	105.255
	116.731	73.6006	53.0341	41.6623	45.9541	97.2914	120.549
	122.106	85.7319	59.2334	35.2158	45.0198	96.8045	101.347
	97.3249	68.7103	41.7314	32.9628	50.7473	92.3903	104.311
	89.0952	68.589	49.2008	38.0567	40.2861	92.597	117.016
osmotic potential	-0.974401	-2.436	-1.4616	-1.9488	-2.6796	-1.9488	-1.218
	-1.5834	-2.9232	-2.3142	-2.1924	-2.436	-2.9232	-1.3398
	-0.852601	-2.436	-1.827	-2.1924	-3.8976	-2.9232	-0.852601
	-1.3398	-3.8976	-2.3142	-2.436	-2.9232	-2.6796	-0.974401
	-1.0962	-2.1924	-1.9488	-1.9488	-3.8976	-3.4104	-1.218
	-1.4616	-2.6796	-2.1924	-2.9232	-3.1668	-1.7052
					-2.6796	-1.7052
root pressure	30.47	6.11				1.63	16.49	15.21
	25.1	3.44				0.92	21.33	10.33
	20.44	2.89				3.11	16.91	8.49
	35.33	2.54				0.74	25.67	16.5
	33.62	6.92				1.3	30.14	12.48
	22.25	5.67				2.68	17.5	11.1
soil temperature	16	10	-3.3	-5.5	-2	11	16	20
	16	10	-3.3	-5.5	-1.8	11	16	20.5
	15	9	-3	-6	-1.8	11	16.1	21
	14.5	9	-4.1	-6.2	-1.7	11.2	16.2	21
	14	8.5	-4.1	-6.5	-2	11.2	16.2	22
	14	8	-4.6	-6.6	-2.1	11.3	16.5	23
electrolyte leagage (leaf)	8.34	11.23	17.38	25.63	26.6906	18.49	12.36
	7.25	8.35	14.36	37.58	27.7652	22.39	11.58
	12.46	14.26	12.39	32.78	21.886	14.83	9.86
	10.36	11.57	19.25	30.53	38.2645	26.87	15.47
	7.92	15.33	20.14	27.12	31.44	16.71	8.44
	11.32	7.52	10.83	35.11	25.03	24.32	16.17
electrolyte leagage (stem)	19.74	23.74	35.11	42.11	38.74	35.78	28.83
	18.73	26.78	24.38	45.34	29.23	37.26	21.64
	22.59	27.32	40.34	34.19	42.71	29.32	21.36
	24.23	19.28	28.32	33.86	36.68	25.41	26.78
	16.44	30.11	30.83	40.26	40.33	28.67	20.11
	26.09	18.69	36.4	36.61	32.01	34.23	28.42
soluble sugar	2.67	3.78	5.37	7.43	9.67	12.11	7.82
	5.08	6.19	6.28	11.51	8.48	9.46	4.33
	6.11	5.22	11.44	15.44	17.11	4.33	2.67
	2.3	3.04	9.03	7.38	10.38	5.07	6.55
	7.44	5.72	12.5	8.99	14.15	4.8	7.53
	2.19	4.42	8.36	9.4	8.47	6.33	2.22
starch	1.34	2.46	4.67	11.05	4.3	2.19	5.11
	4.08	5.1	3.22	6.33	3.28	5.34	5.67
	5.4	3.34	2.79	7.18	7.89	6.67	3.24
	3.11	4.33	1.4	5.07	9.46	8.33	4.05
	4.29	2.45	2.33	9.34	3.11	7.14	2.18
	3.05	1.77	1.22		6.77		2.37
	Photosynthesis rate	Stomatal Conductance	Transpiration rate
Autumn	12.2	0.091	2.08
	6.24	0.047	0.857
	10.6	0.0484	0.978
	8.79	0.0558	1.23
	6.1	0.0751	0.928
	11.84	0.104	1.74
Winter	3.62	0.0346	0.361
	5.11	0.046	0.561
	3	0.0368	0.465
	4.9	0.0365	0.272
	4.1	0.022	0.415
	4.45	0.0266	0.351
Vessel diameter (main culm)	71.67	55.16	62.78	80.85	80.85	75.3	88.34	55.69	55.24	72.36	65.59	70.15	65	63.38	66.17	70.63	83.3	58.93	63.74	66.41	73.26	72.74	75.78	59.64	72.3	75.42	60.3	59.18	57.34	68.21	74.33	75.69	71.28	75.34	74.1	70.33	65.12	72.34	75.3	50.4	50.59	76.41	78.63	79.6	74.33	70.1	60.18	58.34	50.26
Vessel diameter (branchlet)	36	28	30.94	29.59	23.2	25.85	43.83	38.19	42.4	33.59	34.59	26.06	33.04	35.95	39.53	38.53	41.79	44.24	30.99	35.33	24.82	40.86	27.68	30.12	34.23	40.31	35.1	29.41	28.67	30.49	33.4	41.33	29.54	36.87	39.49	27.15	29.44	43.1	44.09	42.07	25.16	26.43	25.32	41.33	39.15	30.2	28.12	40.1	39.02
Vessel diameter (Petiole)	11.76	11.69	9.15	12.3	8.27	9.44	10.52	7.98	9.99	12.27	9.64	8.77	7.94	8.08	10.55	7.94	8.32	7.22	7.13	8.56	10.69	7.88	8.6	11.45	10.33	9.64	8.7	7.45	10.66	11.39	9.22	9.81	8.31	7.94	9.66	9.21	9.8	10.4	11.3	12.09	10.8	9.5	11.33	11.4	10.89	10.44	12.3	11.56	6.94
Vessel diameter (Chief vein of leaves)	6.4	8.11	6.98	6.53	5.88	6.99	8.27	8.54	5.41	5.3	6.33	7.2	7.44	5.9	6.3	6.48	7.59	7.33	7.46	6.91	7.66	8.7	8.24	8.33	8.54	7.91	8.34	8.66	7.16	7.11	6.95	6.77	6.91	7.68	7.4	8.33	8.95	8.66	7.15	7.77	7.91	8.8	6.44	5.97	5.8	6.66	6.33	6.1	5.89
[truncated: 3 more columns]
